# Supplementary material
Source: PubMed Central journal article supplement (PMC4876033)

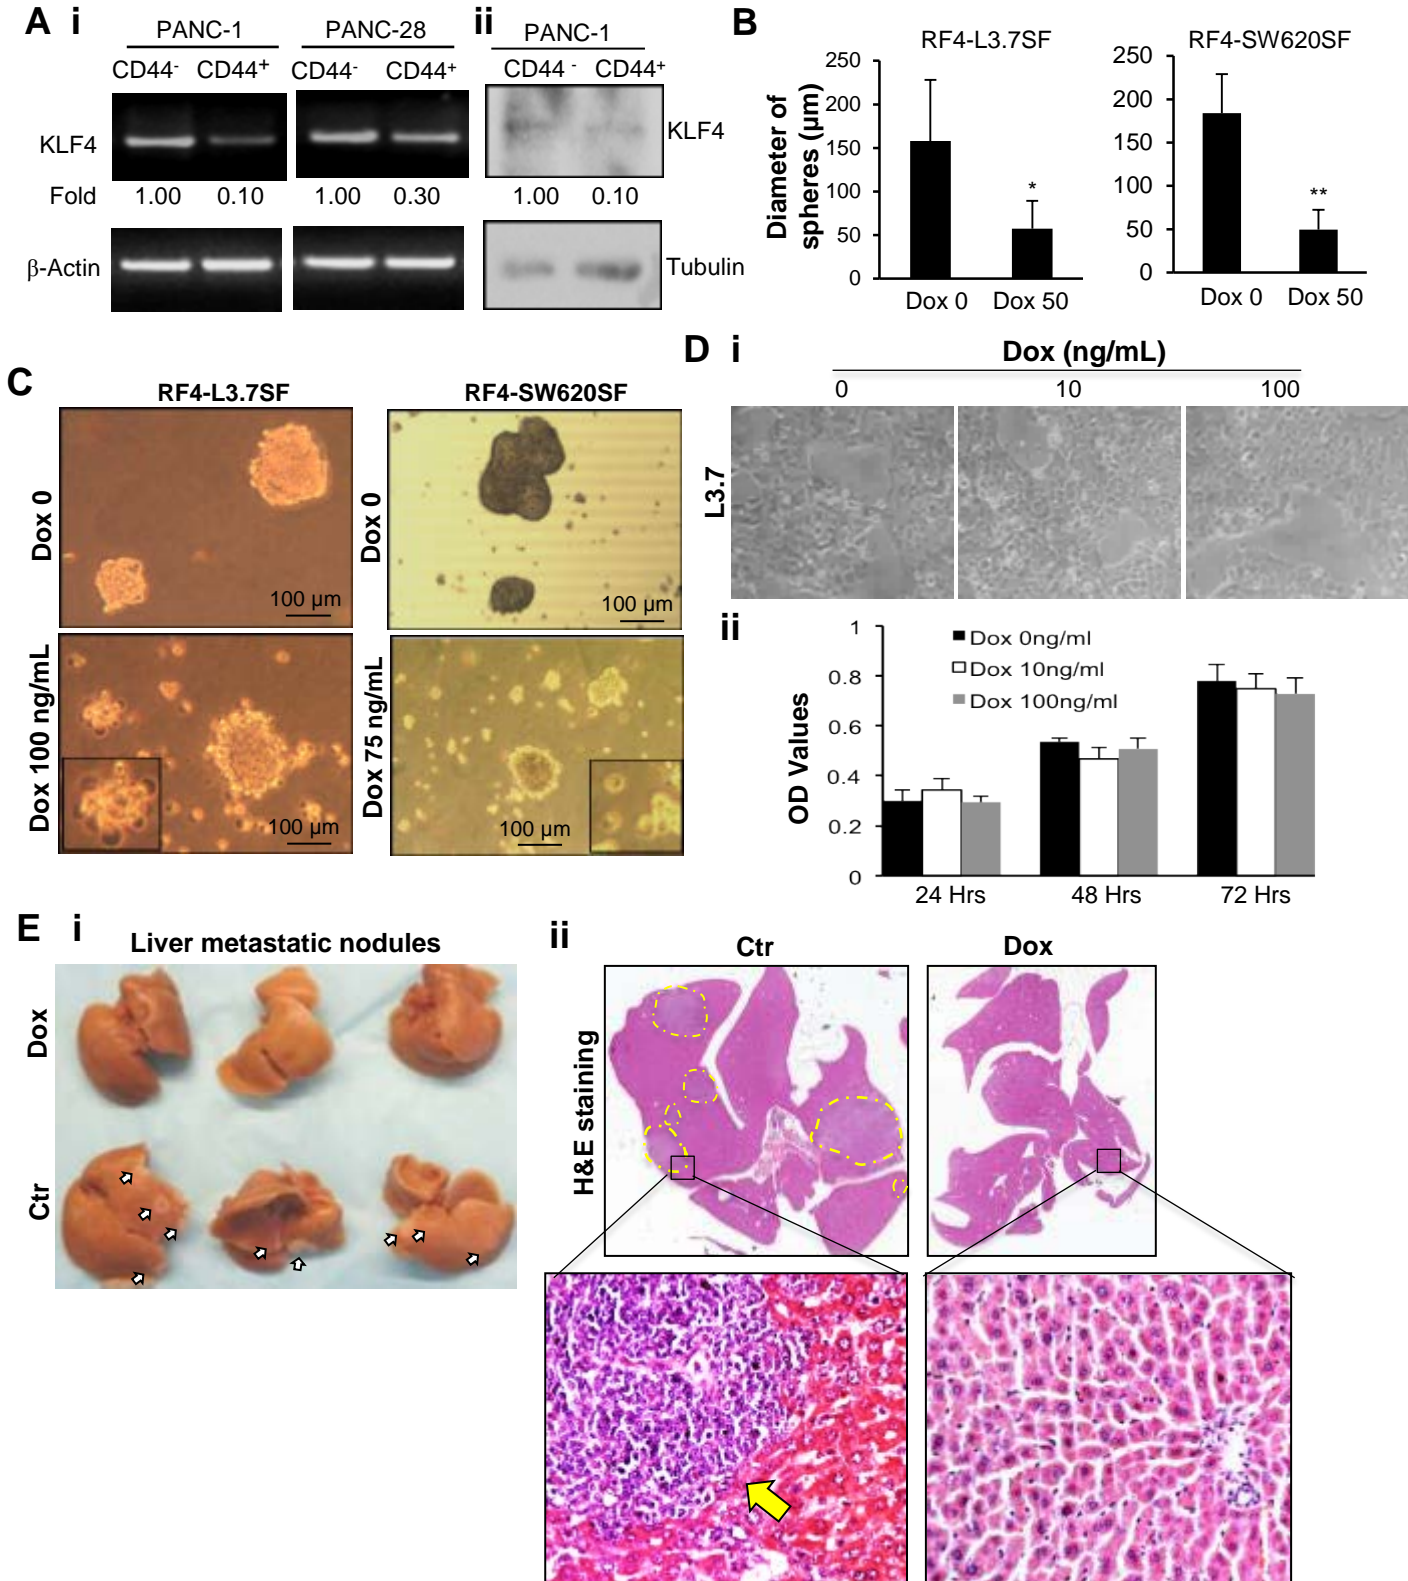

**A**

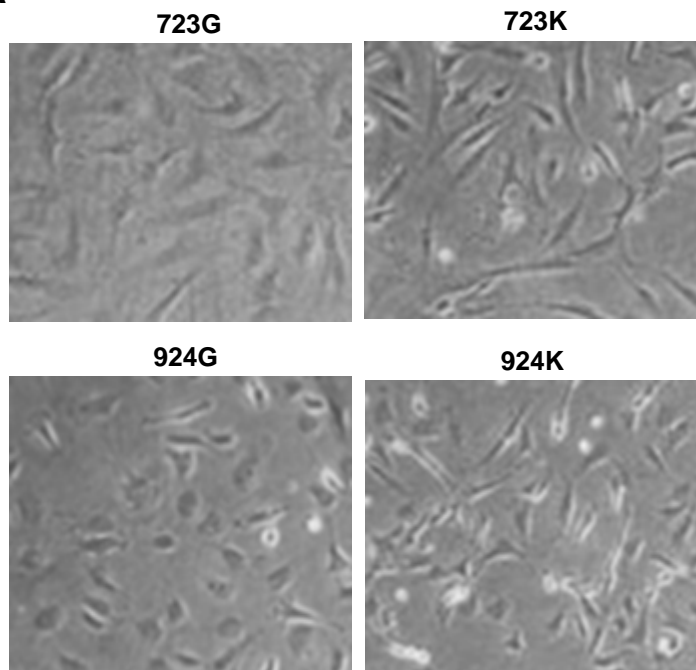

**B**

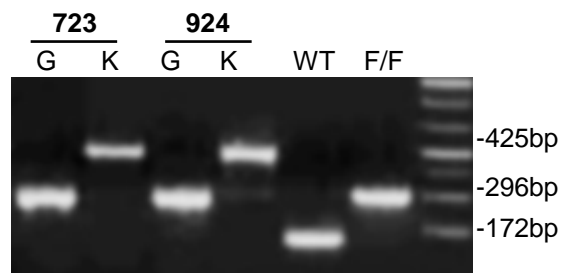

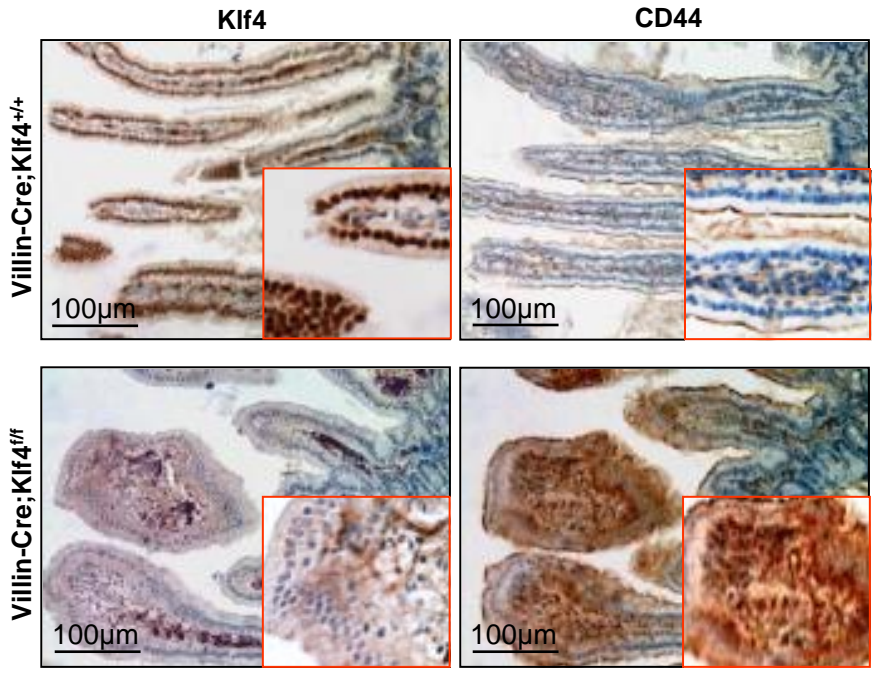

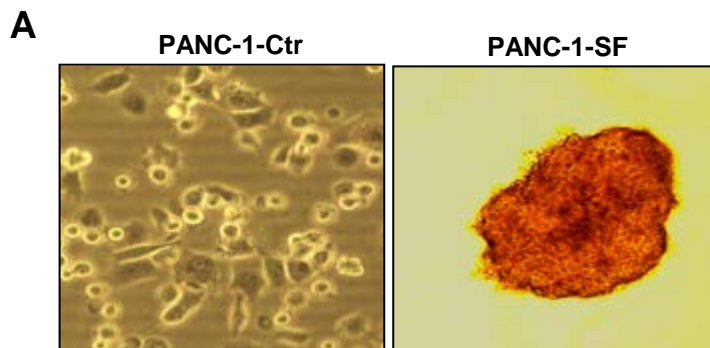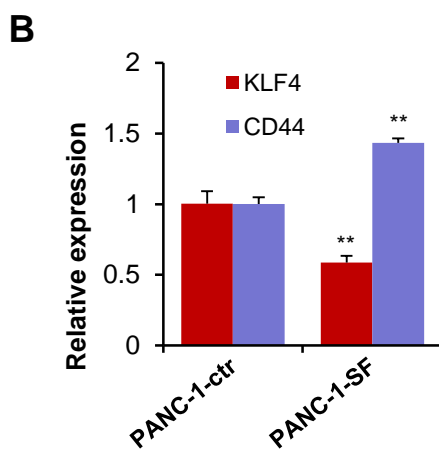

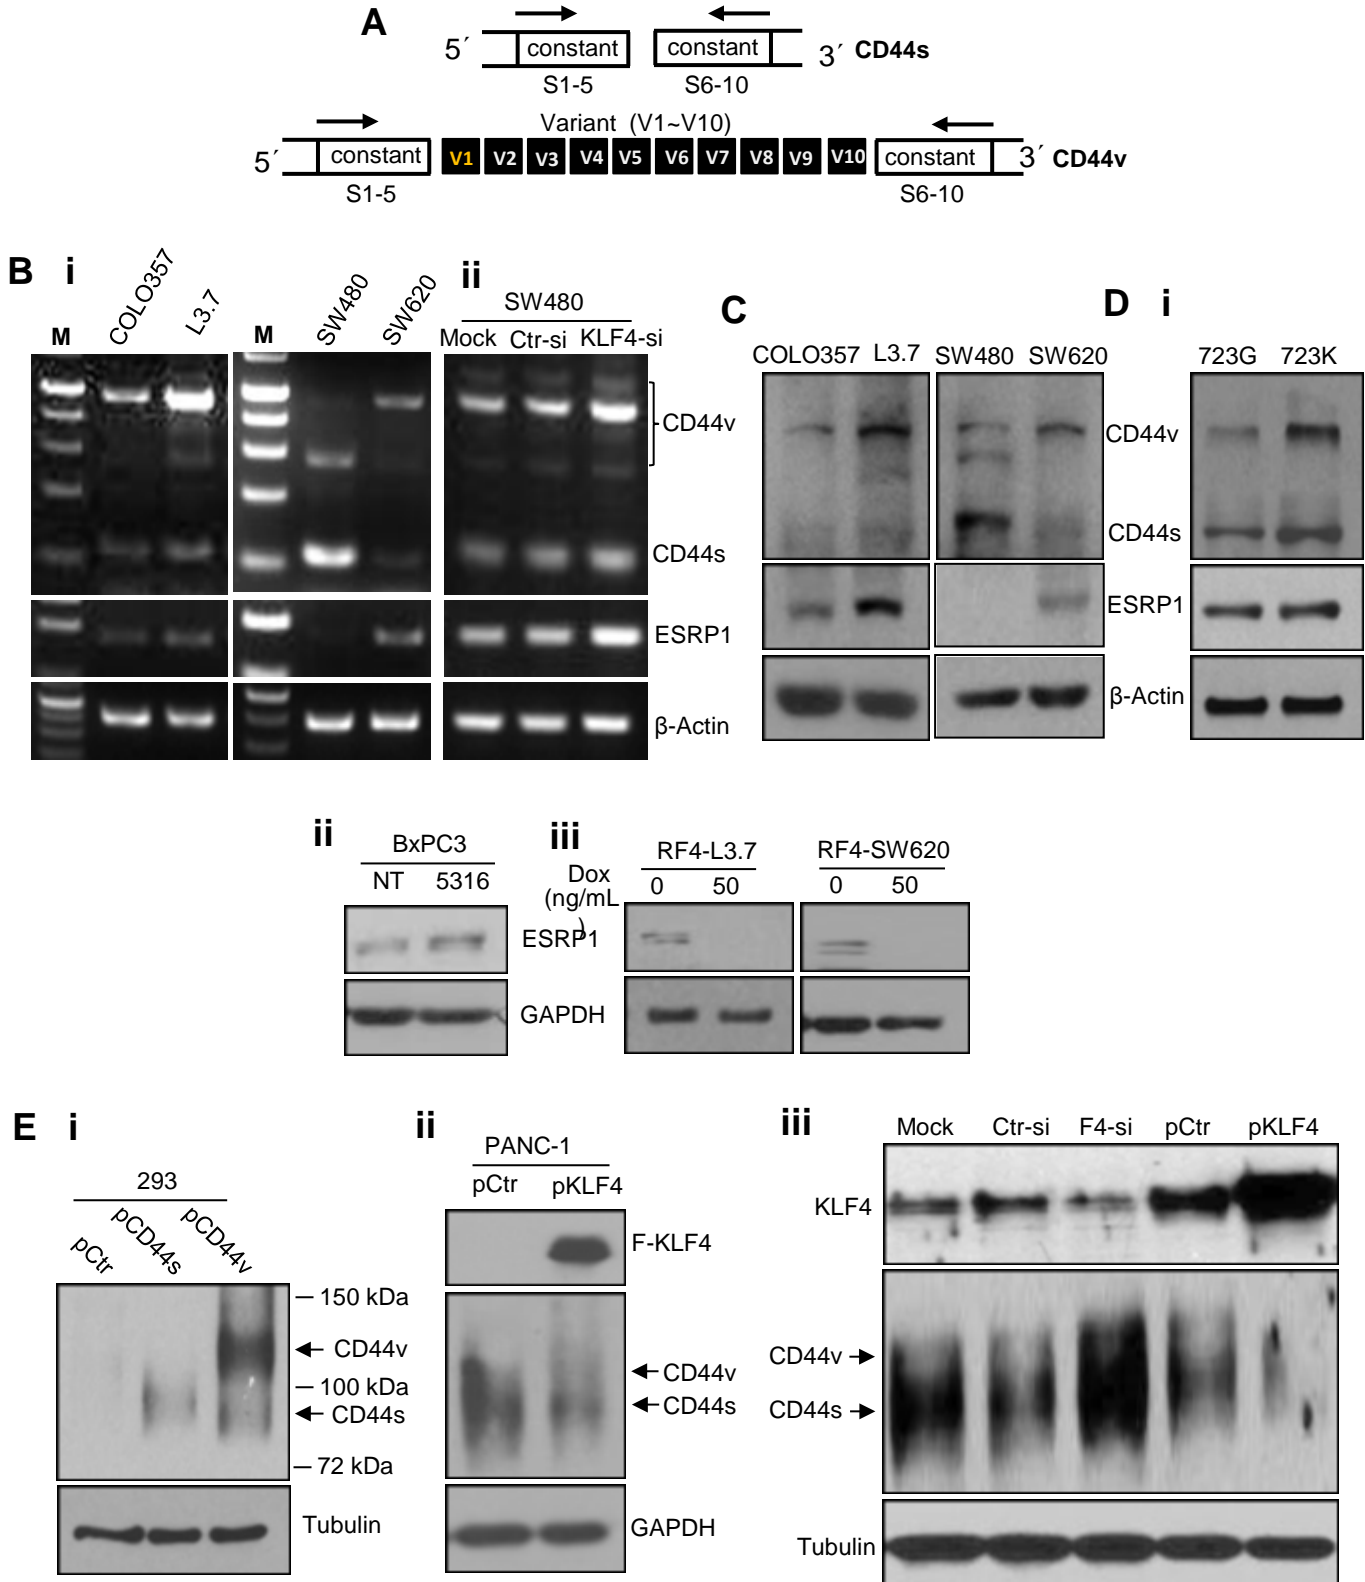

**A**

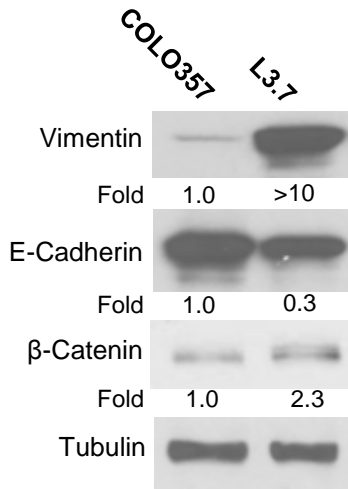

**B**

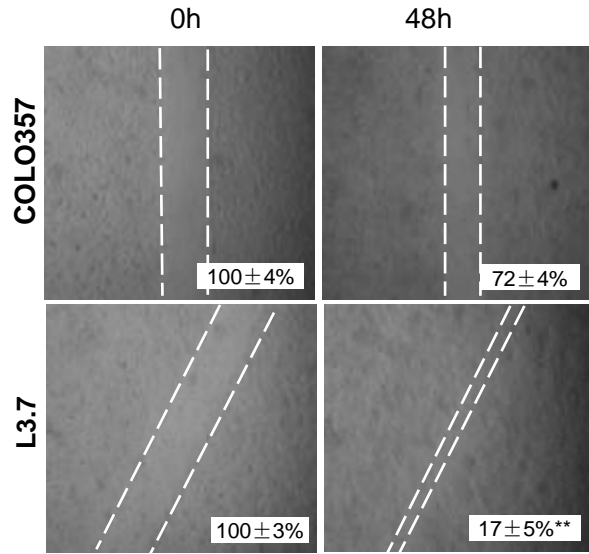

**C i**

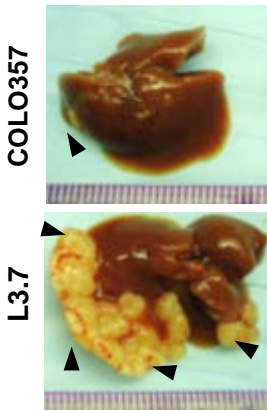

**ii**

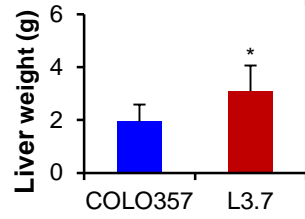

**iii**

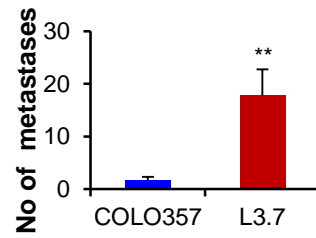

**iv**

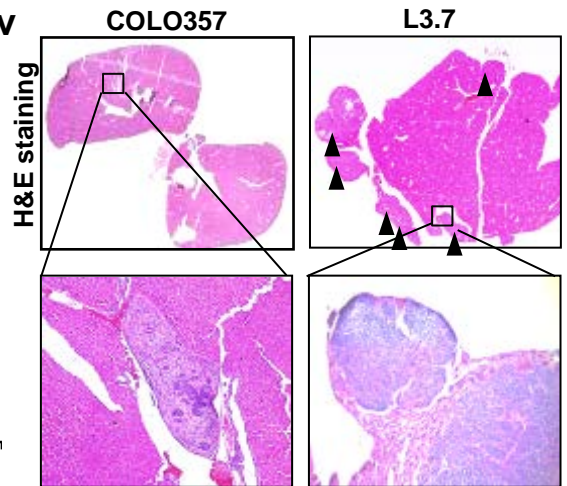



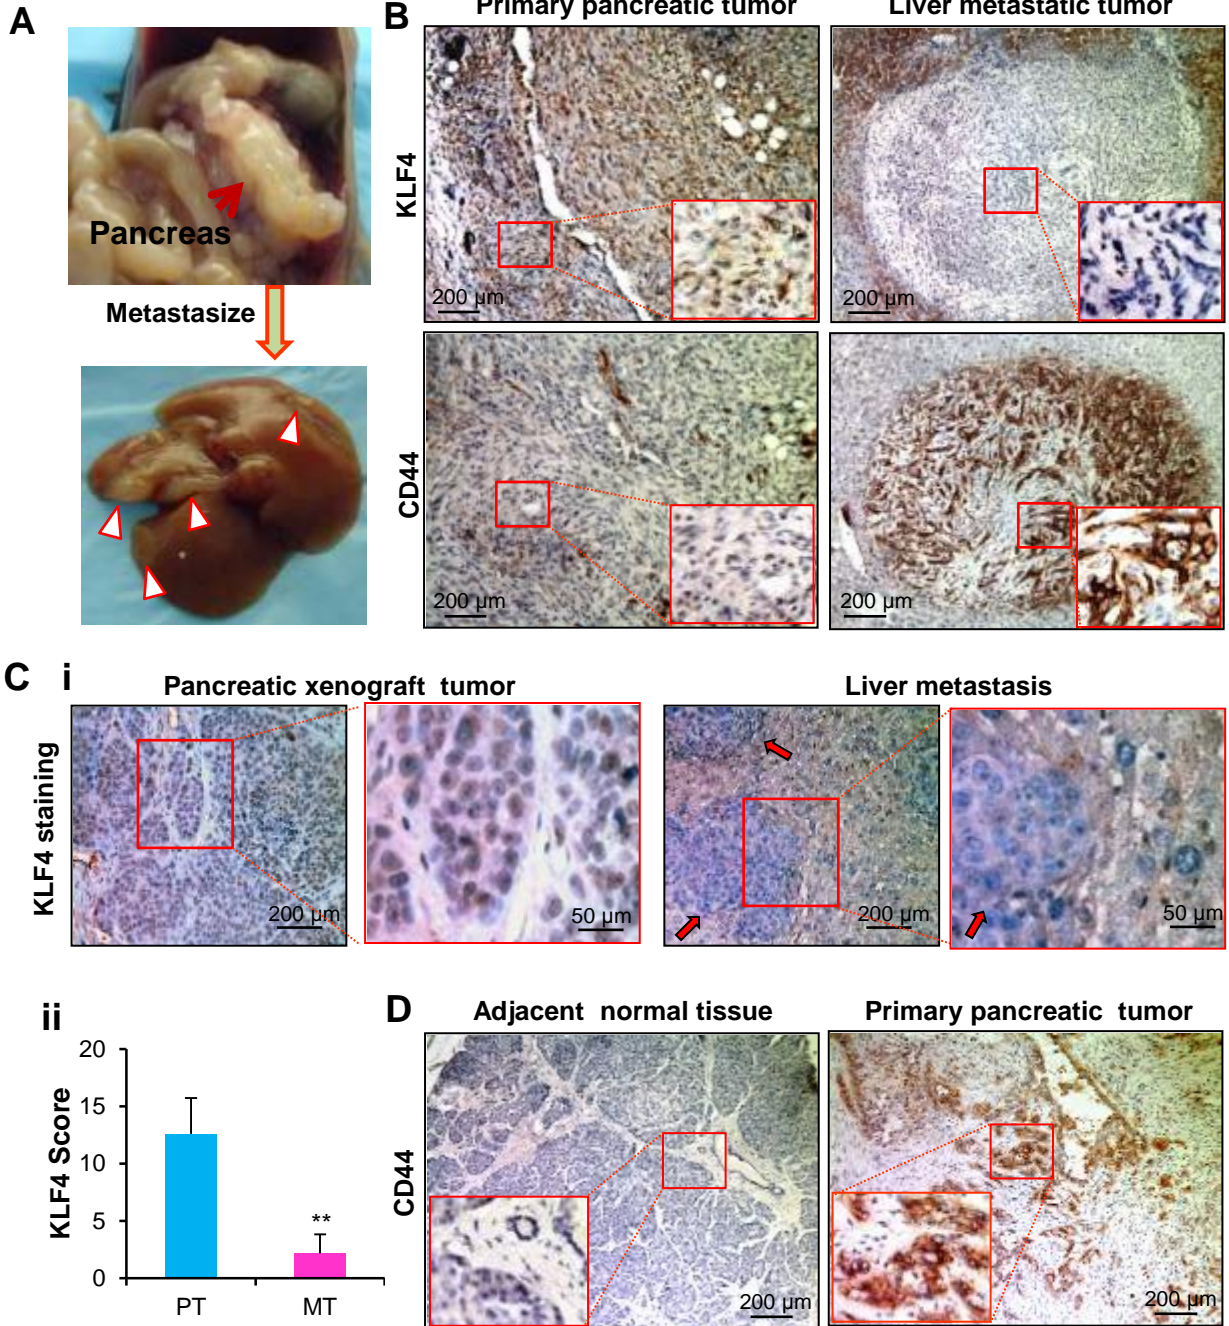

Supplement: NIHMS758292-supplement-Figures_S1-S7.pdf [file NIHMS758292-supplement-Figures_S1-S7.pdf]
